# Supplementary material
Source: PubMed Central journal article supplement (PMC7335344)

# Supplementary Figure 1

A

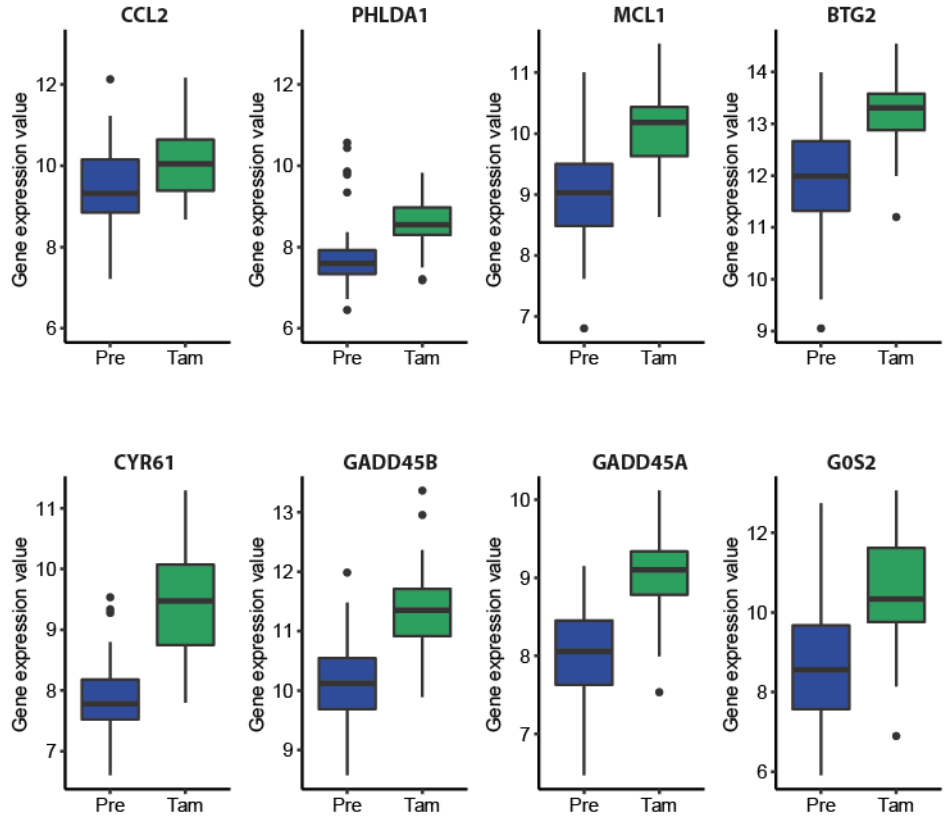

# Supplementary Figure 2

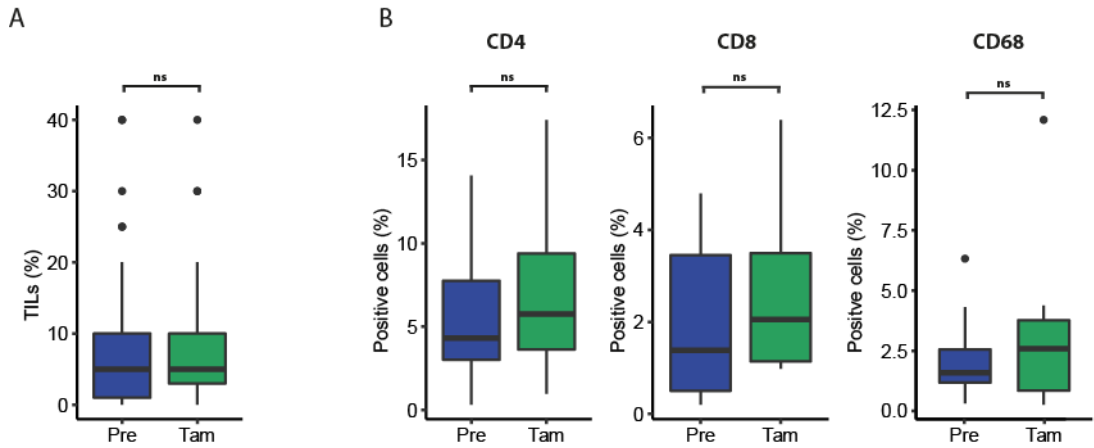

# Supplementary Figure 3

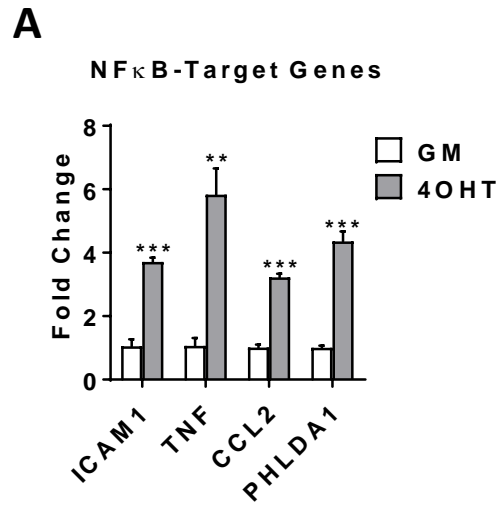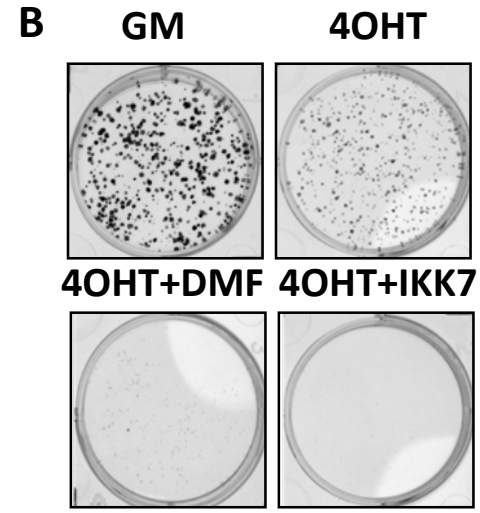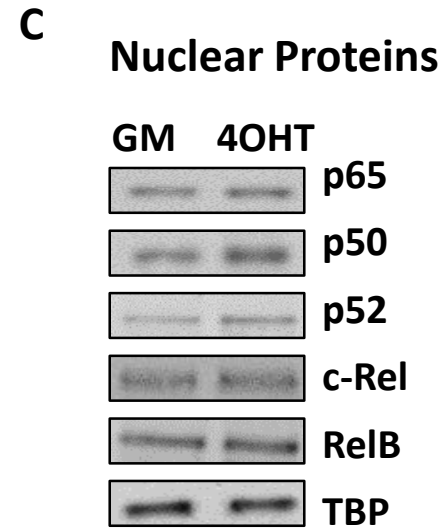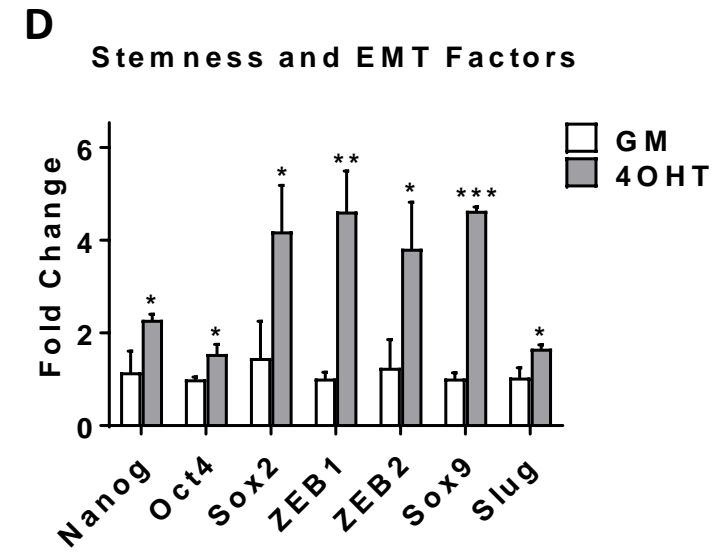

Supplementary Figure 4

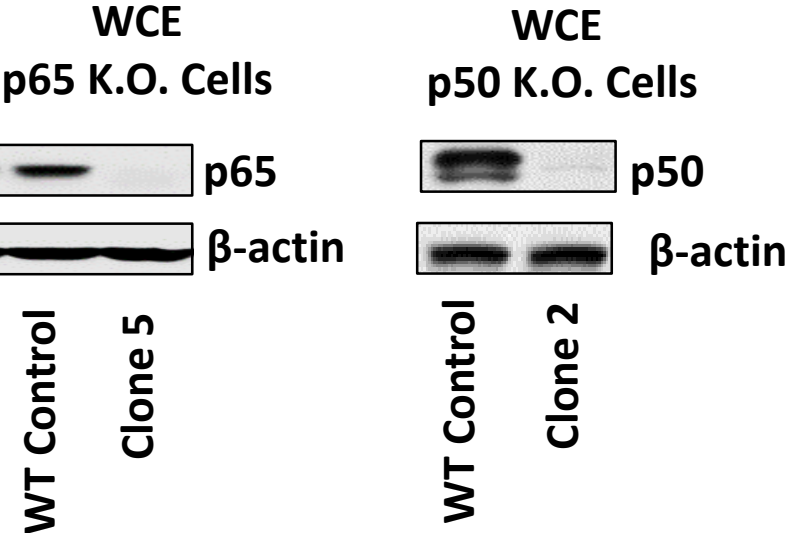

# Supplementary Figure 5

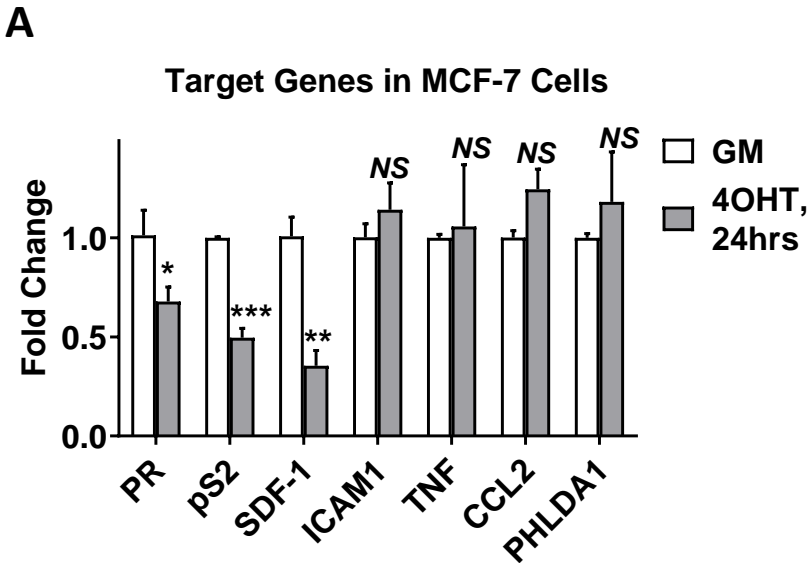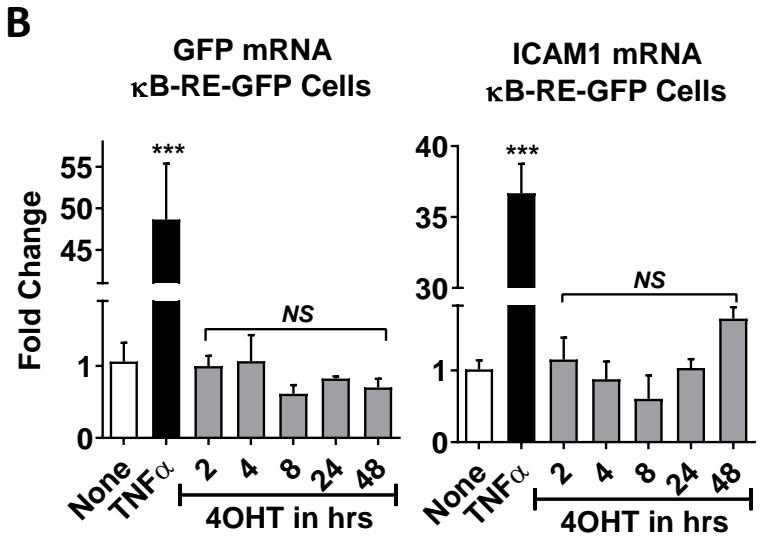

Supplementary Figure 6

% GFP+ Population in Secondary Clonogenic Assay

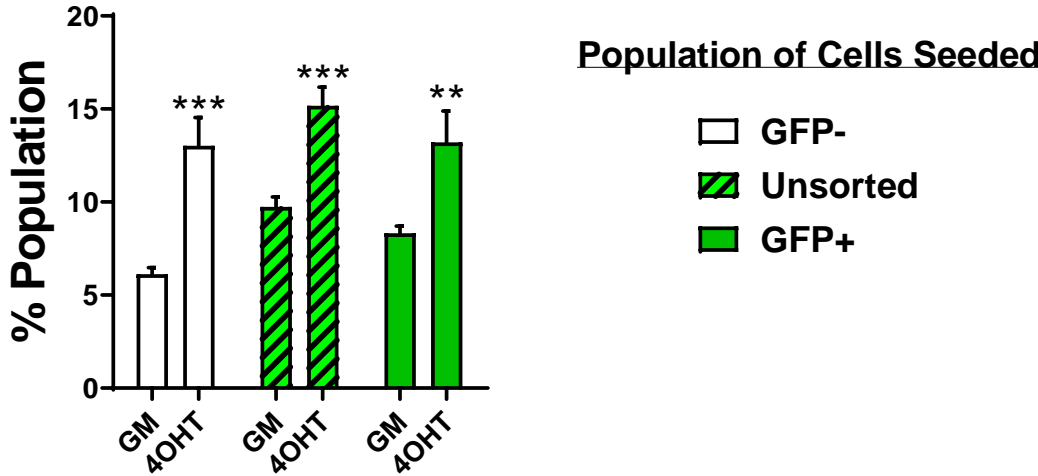

Supplement: NIHMS1582585-supplement-1.pdf [file NIHMS1582585-supplement-1.pdf]
